# Supplementary material for: Depigmenting Effect of Resveratrol Is Dependent on FOXO3a Activation without SIRT1 Activation
Source: PubMed Central journal article supplement (PMC5486036; doi:10.3390/ijms18061213), 2017-06-07
Supplement: ijms-18-01213-s001.pdf [file ijms-18-01213-s001.pdf]

# Supplementary Material: Depigmenting Effect of Resveratrol Is Dependent on FOXO3a Activation without SIRT1 Activation

Soon-Hyo Kwon, Hye-Ryung Choi, Youn-A Kang and Kyoung-Chan Park

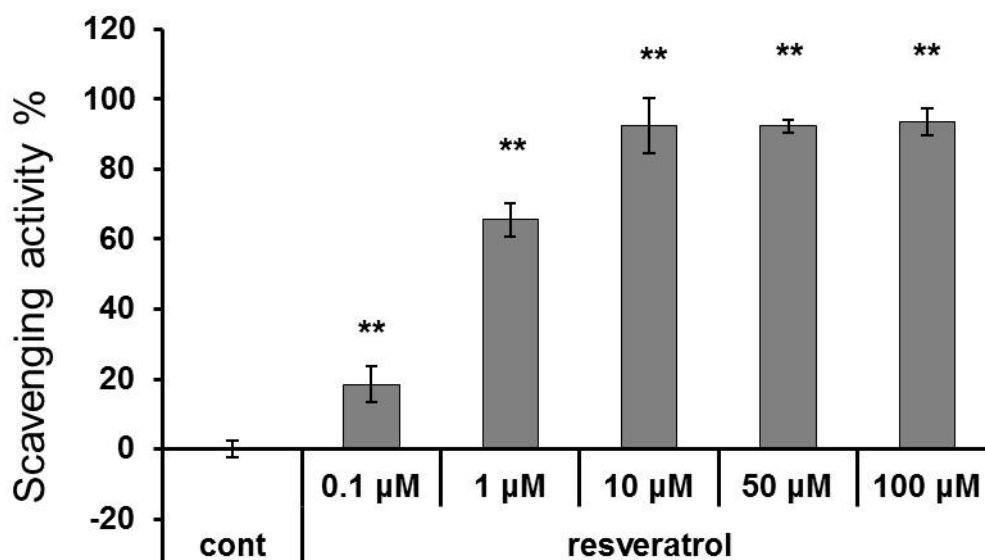

**Figure S1.** DPPH assay was performed in resveratrol at five concentrations (0.1μM to 100μM). Each sample of stock solution (2μl of 100X) was added to 80μl of 0.25 mM DPPH and 118μl of 70% ethanol, to produce a final DPPH concentration of 0.1 mM. The mixture was vigorously shaken, and its absorbance was measured at 517 nm using an ELISA reader.

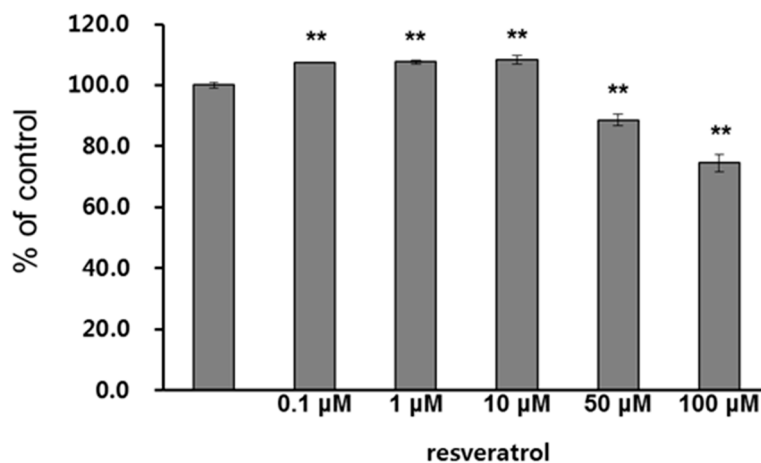

**Figure S2.** Cytotoxicity was performed at five different concentrations (0.1μM to 100μM). Normal human melanocytes were cultured and incubated with CCK-8 solution. The amount of water-soluble formazan generated by the activity of dehydrogenase was measured by an optical density at 450 nm using an ELISA reader.
